# Supplementary material for: Spatioselective functionalization of gold nanopillar arrays
Source: Nanoscale Adv. 2019 Mar 19;1(6):2208–15. doi: 10.1039/c9na00149b (PMC9418540; doi:10.1039/c9na00149b)
Supplement: NA-001-C9NA00149B-s001 [file NA-001-C9NA00149B-s001.pdf]

## Spatioselective functionalization of gold nanopillar arrays

Claire Chattaway,<sup>1</sup> Delphine Magnin,<sup>1</sup> Etienne Ferain,<sup>1,2</sup> Sophie Demoustier-Champagne,<sup>1,\*</sup> Karine Glinel<sup>1,\*</sup>

<sup>1</sup> Institute of Condensed Matter & Nanosciences (Bio & Soft Matter), Université catholique de Louvain, Croix du Sud 1, box L7.04.02, B-1348 Louvain-la-Neuve, Belgium.

<sup>2</sup> it4ip S.A., avenue Jean-Etienne Lenoir 1, B-1348 Louvain-la-Neuve, Belgium.

### Corresponding Authors

\*Email: karine.glinel@uclouvain.be; sophie.demoustier@uclouvain.be

## Supplementary Information

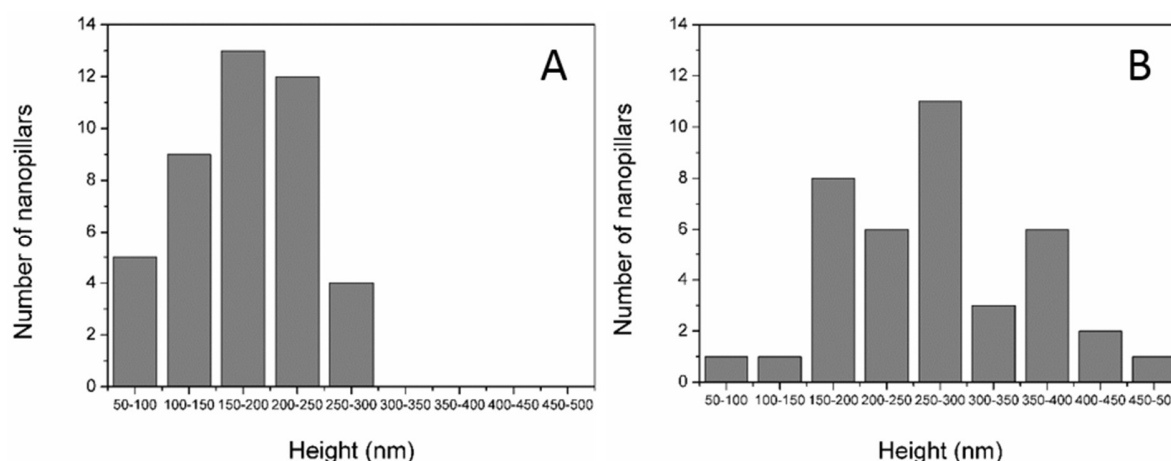

**Figure S1.** Histograms showing the height distribution of the protruding parts of nanopillars out of the PAA layer evaluated by AFM before (A) and after (B) a 2x120 sec air-plasma etching (B). The height of the gold nanopillars is  $477 \pm 105$  nm.

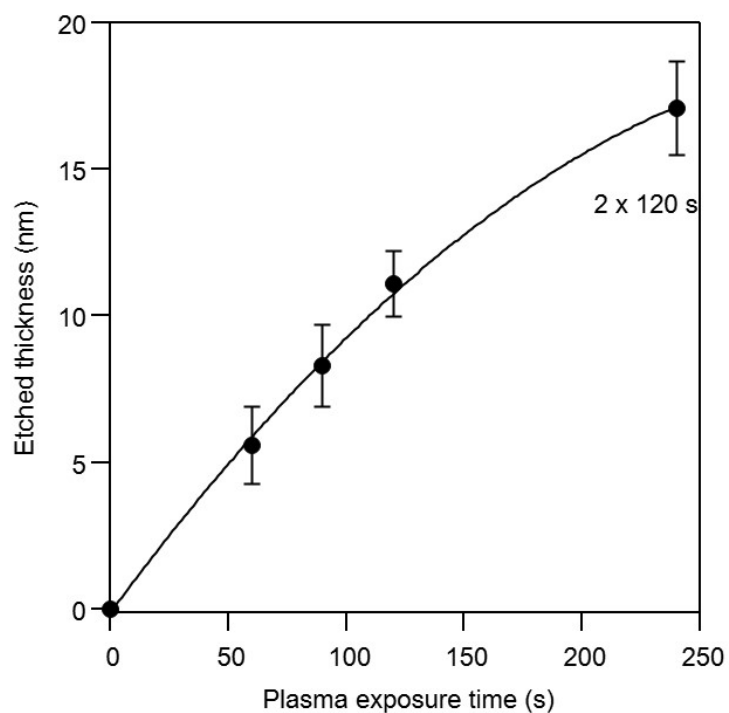

**Figure S2.** Variation of the PAA layer thickness etched as a function of exposure time to air plasma. The initial thickness of the PAA layer, before exposure, is 260 nm.

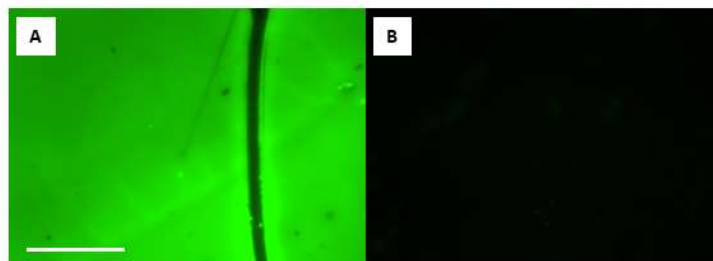

**Figure S3.** Epifluorescence microscopy images of flat gold surfaces covered with a MUA layer activated (B) or not (A) by EDC/sulfo-NHS then incubated with RGD-FITC peptide. The black line seen in image (B) is a deliberate scratch done to show the fluorescence intensity of the grafted layer. The scale bar represents 200  $\mu\text{m}$ .

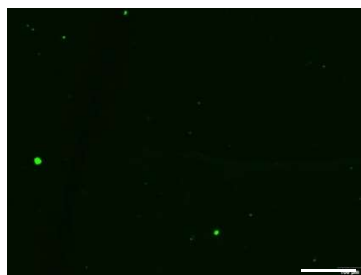

**Figure S4.** Epifluorescence microscopy image of a gold nanopillar surface entirely covered with a thiolactone copolymer layer grafted with maleimide gold nanoparticles, incubated with EDC/sulfo-NHS then RGD-FITC. The scale bar represents 200  $\mu\text{m}$ .
